# Supplementary material
Source: PubMed Central journal article supplement (PMC3478634)
Supplement: 1208312109_pnas.201208312SI.pdf [file 1208312109_pnas.201208312SI.pdf]

# Supporting Information

Delogu et al. 10.1073/pnas.1208312109

## SI Text

**Carbon Nanotube Dispersion Preparation.** All carbon materials, dispersed in ultrapure water, were sonicated for 5 min (functionalized carbon nanotubes, CNTs) to 45 min (pristine CNTs) in a Branson 3200 water bath sonicator and vortexed for few seconds before *in vitro*, *ex vivo*, and *in vivo* experiments. The long time of sonication does not affect the morphology of the pristine nanotubes. In the case of the functionalized multiwalled CNTs (MWCNTs) used in the experiments described in Fig. 1A–C, the solid was just added to ultrapure water without any sonication or vortexing.

**Animal Procedures, Histopathology, and Immunophenotypic Characterization of Inflammatory Cells.** Three female healthy pigs (*Sus Scrofa* species) 8-wk-old and about 15 kg in weight were bought from Azienda Agricola Le Cascine. The animals were housed in accordance to the guide of use of laboratory animals of the Italian Ministry of Health. For MWCNT administration, pigs were under anesthesia with azaperone (Strensil; Janssen-Cilag) (1 mL/20 kg). Five milliliters of MWCNTs at a concentration of 1,000 µg/mL were injected into the bladder ( $n = 2$ ) or intravenously ( $n = 1$ ). Urine were collected immediately after ultrasonography and analyzed by transmission electron microscopy (TEM). Seven days after the injection of MWCNTs, pigs were killed with azaperone treatment and Tanax (Intervet International). For toxicity investigation ( $n = 3$ ), blood samples were collected before the *in vivo* experiment and right before killing, and examined with Advia 2120 (Siemens) and Dimension RXL (Siemens).

For histopathology, samples from kidney, bladder, liver, lung, and heart were fixed in neutral buffered 4% (vol/vol) formalin and then embedded in paraffin. Paraffin-embedded tissue blocks were cut into 5-µm-thick sections and stained with H&E (Bio-optica), to be subsequently examined under a light microscope (Leica) coupled with a digital camera.

The *in situ* identification of macrophages and T and B lymphocytes was performed by detecting the cluster of differentiation antigen systems. CD163 was used to identify macrophages; CD79 and CD3 were used to recognize B cells and T lymphocytes, respectively. Briefly, 5- to 7-µm-thick sections were placed on polylysine-L-coated glass slides for paraffin wax removal with xylene and for rehydration by an ethanol series. For CD3 and CD79 antigen retrieval, sections were immersed in pH 9 Tris Buffer EDTA solution and treated two times in a microwave oven at 850 W for 10 min. For CD163 antigen retrieval we used a mi-

crowave oven at 850 W (three runs each of 5 min) with sections being immersed in a solution of 0.01 M citric acid (pH 6.1). Slides were then immersed in a solution of 0.3% H<sub>2</sub>O<sub>2</sub> for 10 min at room temperature to quench endogenous peroxidase activity, rinsed with PBS; nonspecific sites were blocked in 5% BSA in PBS. Further steps included utilization of a biotin-streptavidin detection method (Vector Laboratories), using the following primary antibodies: MCA 2311 (AbD Serotec) anti-porcine CD163 MoAb, anti-human CD79 MoAb (DakoCytomation), and a rabbit polyclonal anti-human CD3 (DakoCytomation). Immune reactions were visualized by 3,3'-diaminobenzidine chromogen solution (Dako). Sections from the tonsil served as positive controls.

**TEM Analysis.** For TEM analysis, the collected urine was diluted five times and deposited on a carbon-coated copper TEM grid (Formvar-Carbon film on 300 square mesh copper grids from Electron Microscopy Sciences) and dried. Alternatively, the urine was dialyzed against deionized water for 1 d using Spectra/Por molecular weight cutoff 12,000–14,000 Da, diluted 2.5 times with deionized water, and deposited on TEM grids. TEM was performed on a Hitachi 600 microscope with an accelerating voltage of 75 kV.

**Ultrasound Image Analysis.** For ultrasonography analysis, we applied a method previously used (1). The ultrasound signal was calculated using Adobe Photoshop CS5 (Adobe Systems). This program had been previously used for ultrasound image analysis (2–4). Ultrasound signal is reported in 8-bit gray scale intensity from 0 to 255 shades of gray recordable. For all ultrasound images displayed, the areas of interest were selected; comparison between samples was performed on the same areas in terms of number of pixel. For the *in vivo* experiment, ultrasound signal calculation was not performed because of the normal small movement of living pigs, even under anesthesia.

**Statistical Analysis.** Statistical analyses on three different and independent incubations for each experiment were performed using Student *t* test for paired data. Data indicated with an asterisk were considered statistically significant ( $P$  value < 0.05). Data are presented as mean ± SD ( $n = 3$ ). *Ex vivo* investigation ultrasound signal was calculated on measurements based on experiments performed in three different livers and three hearts from healthy pigs. For *in vivo* data, biocompatibility results were derived from three pigs treated with functionalized MWCNTs.

1. Martinez AW, Phillips ST, Whitesides GM (2008) Three-dimensional microfluidic devices fabricated in layered paper and tape. *Proc Natl Acad Sci USA* 105:19606–19611.
2. Liu P, Gao YH, Tan KB, Liu Z, Zuo S (2004) Grey scale enhancement of rabbit liver and kidney by intravenous injection of a new lipid-coated ultrasound contrast agent. *World J Gastroenterol* 10:2369–2372.

3. Lassau N, et al. (2006) Gastrointestinal stromal tumors treated with imatinib: Monitoring response with contrast-enhanced sonography. *AJR Am J Roentgenol* 187:1267–1273.
4. Iwamoto T, Shinozaki K, Kiuchi A, Umahara T, Takasaki M (2003) Evaluation of B-mode ultrasonographic images of carotid lesions by computer analysis as compared with visual assessment. *J Stroke Cerebrovasc Dis* 12:59–65.

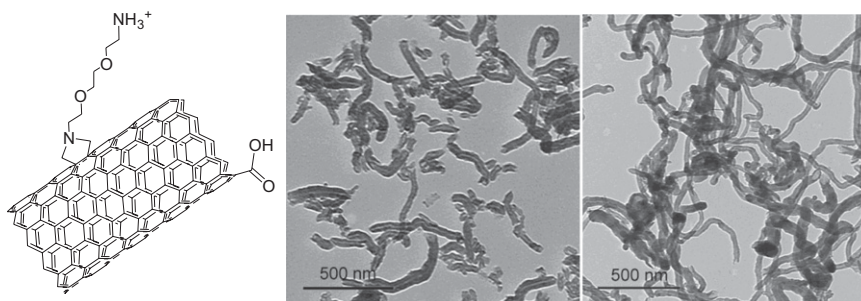

**Fig. S1.** Molecular structure (Left) and TEM of the ox-MWCNT-NH<sub>3</sub><sup>+</sup> (Center), and TEM of pristine MWCNTs (Right).

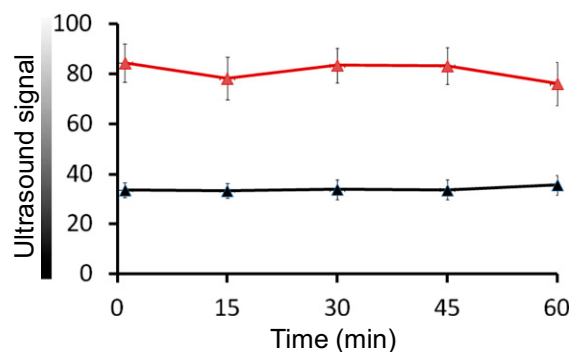

**Fig. S2.** Long-lasting ultrasound contrast of functionalized MWCNTs in vitro. The graph shows the ultrasound signal recorded for water, used as negative control (black line) and ox-MWCNT-NH<sub>3</sub><sup>+</sup> (red line) (1,000 µg/mL) aliquoted in a 96-well plate. Echoes were recorded after 1, 10, 15, 30, and 60 min of ultrasound irradiation. Ultrasound signal in the y axis dimension is expressed in gray shade value based on 8-bit scale intensity from 0 to 255. The error bars represent SD.

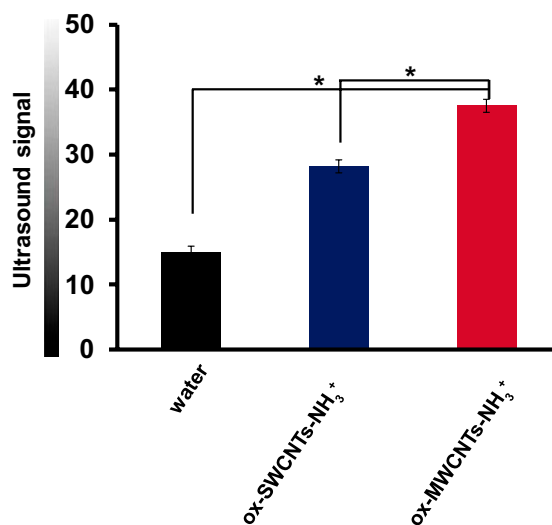

**Fig. S3.** Comparison between single-walled CNTs (SWCNTs) and MWCNTs. Ultrasound signal recorded from water, SWCNTs, and MWCNTs both functionalized by oxidation and further functionalized by 1,3-dipolar cycloaddition of azomethine ylides (ox-SWCNT-NH<sub>3</sub><sup>+</sup>, ox-MWCNT-NH<sub>3</sub><sup>+</sup>). Data were collected in a 96-well plate. CNTs were used at a concentration of 1,000 µg/mL. Signal is reported in 8-bit gray scale intensity from 0 to 255 shades of gray recordable. Intensity was calculated on a base of three experiments. The error bars represent SD ( $n = 3$ ); \* $P < 0.05$ ; analyzed pixel = 15,664.





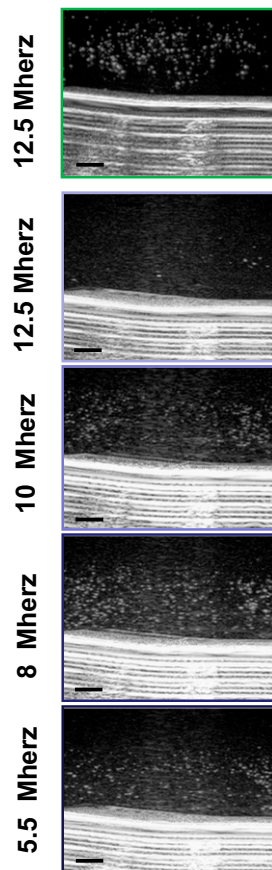

**Fig. S7.** Bladder phantom detection of functionalized MWCNTs at different frequencies. A bladder phantom was built specifically to assess the echogenic property of MWCNTs at different wave frequencies in megahertz. The phantom was constituted of a Plexiglas reservoir with a diameter of 10 cm and a vertical height of 12 cm, able to hold ~1,000 mL. We used water as a solution because it gives the same ultrasound signal of urine. The bladder phantom was filled with 250 mL, the amount of two glasses of water, at 37 °C. MWCNTs (2 mL at 1,000 µg/mL) were injected and an ultrasound image recorded at 12.5 MHz in tissue harmonic imaging (THI) modality (top green rectangle); all of the other images from top to bottom were captured without THI at 12.5, 10, 8, 5.5 MHz, respectively, depth 41 mm, gain 130. (Scale bars, 5 mm.)





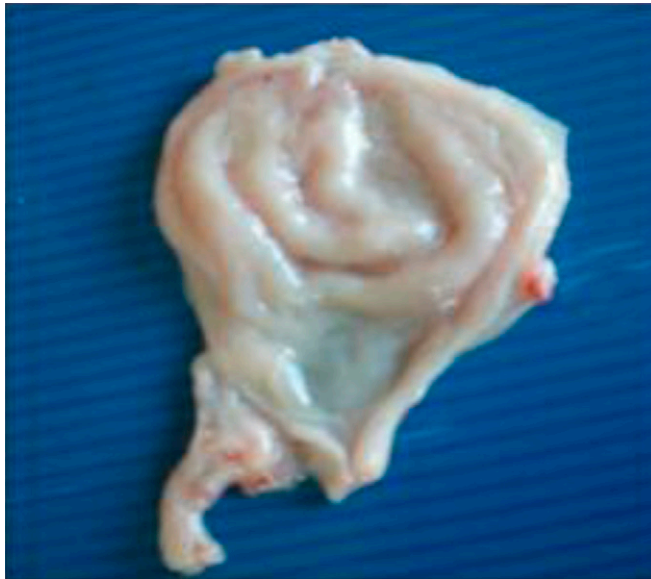

**Fig. 512.** Autopsy of the experimental pigs. A representative image of a pig bladder after 7 d from MWCNT ultrasonography.

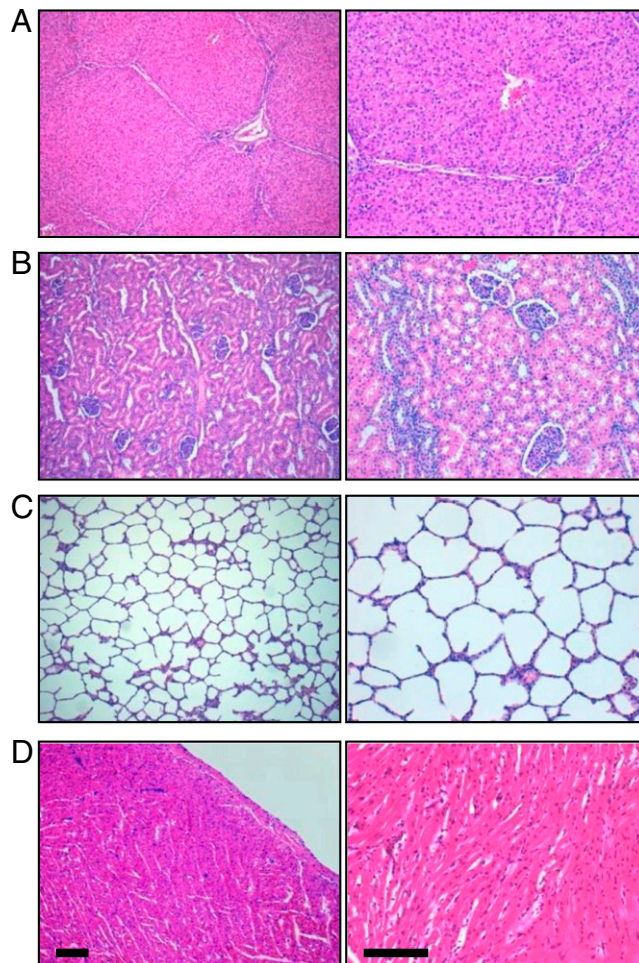

**Fig. 513.** Histology of liver, kidney (cortex), lung, and heart. Paraffin-embedded sections stained with H&E of liver (A), kidney (cortex) (B), lung (C), and heart (D) after 7 d from the MWCNT injection. The images are representative results of three investigations. (Scale bars, 100  $\mu\text{m}$ .)



**Table S1. Complete blood count and chemical profile of experimental pigs**

| Blood count and chemical profile | Preultrasonography |      |      | Postultrasonography |      |      |
|----------------------------------|--------------------|------|------|---------------------|------|------|
|                                  | N1                 | N2   | N3   | N1                  | N2   | N3   |
| <b>Blood count (%)</b>           |                    |      |      |                     |      |      |
| Neutrophils                      | 33.7               | 28.8 | 25.9 | 43.4                | 26.0 | 24.2 |
| Lymphocytes                      | 55.7               | 61.9 | 66.8 | 51.4                | 67.3 | 66.1 |
| Monocytes                        | 5.4                | 7.0  | 4.8  | 2.2                 | 4.5  | 7.4  |
| Eosinophils                      | 4.5                | 0.6  | 0.7  | 1.5                 | 0.7  | 0.8  |
| Basophils                        | 0.3                | 1.3  | 1.2  | 0.2                 | 0.8  | 0.9  |
| Leukocytes                       | 0.5                | 0.9  | 0.6  | 1.2                 | 0.7  | 0.5  |
| <b>Chemical profile</b>          |                    |      |      |                     |      |      |
| Total bilirubin(mg/dL)           | 0.27               | 0.3  | 0.3  | 0.15                | 0.2  | 0.2  |
| Total protein(g/dL)              | 5.1                | 5.4  | 5.1  | 4.9                 | 4.8  | 5.0  |
| Albumin (g/dL)                   | 2.1                | 2.2  | 2.1  | 2.0                 | 1.8  | 1.9  |
| Urea nitrose (mg/dL)             | 18                 | 25   | 31   | 18                  | 26   | 23   |
| Creatinine (mg/dL)               | 0.8                | 1.3  | 0.9  | 1.1                 | 1.0  | 1.0  |
| Alkaline phosphatase (U/dL)      | 200                | 234  | 287  | 199                 | 224  | 300  |
| Alanine aminotransferase (U/L)   | 63                 | 60   | 57   | 64                  | 67   | 57   |
| Aspartate (U/L)                  | 91                 | 58   | 36   | 64                  | 77   | 37   |

Values are reported for preultrasound investigation and after 7 d from MWCNT administration ( $n = 3$ , N1 and 2 indicate the pigs treated intravesically and N3 indicates the pig injected with MWCNTs intravenously).

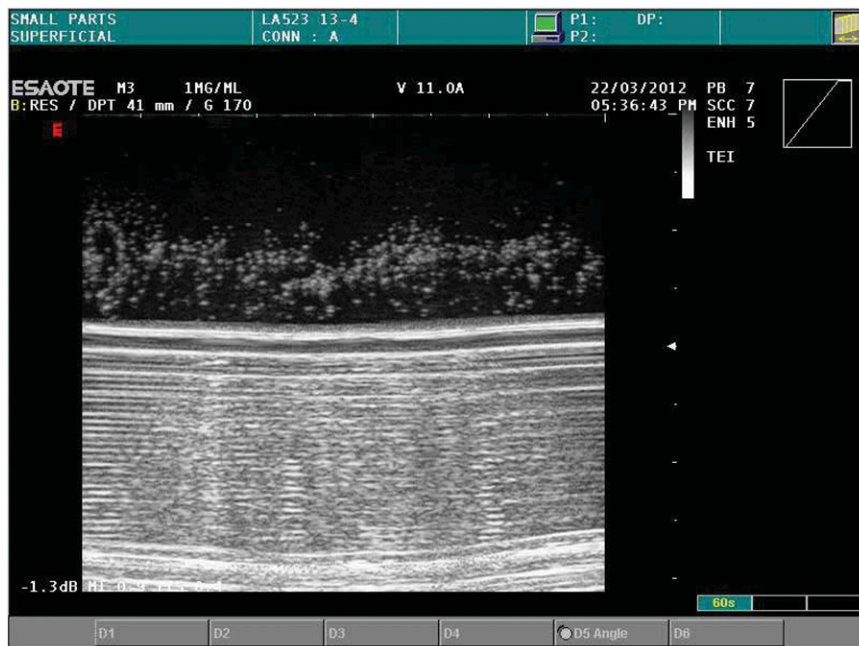

**Movie S1.** Functionalized MWCNTs injected in the bladder phantom. ox-MWCNT-NH<sub>3</sub><sup>+</sup> were injected in the bladder sample at a concentration of 1 mg/mL in water and detected at 12.5 MHz in THI modality.

[Movie S1](#)

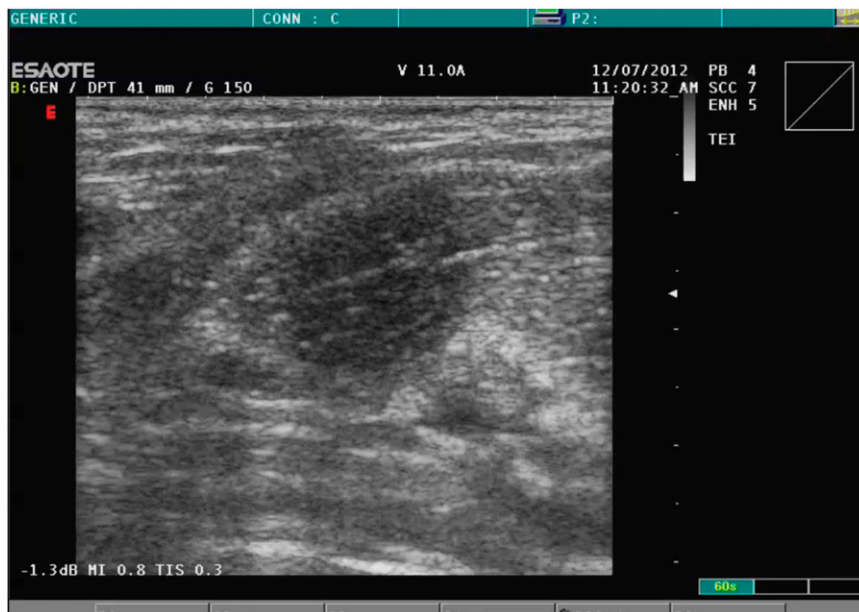

**Movie S2.** Functionalized MWCNTs injected in the anterior vena cava of the pig. ox-MWCNT-NH<sub>3</sub><sup>+</sup> were administered in vivo by intravenous injection into the anterior vena cava of the pig. The movie was recorded using a 7.5–12 MHz linear probe in THI modality.

[Movie S2](#)
